# Supplementary material for: Pull-down combined with proteomic strategy reveals functional diversity of synaptotagmin I
Source: PeerJ journal article supplement (doi:10.7717/peerj.2973), 2017-02-08
Supplement: Supplementary_Figures.pdf [file Supplementary_Figures.pdf]

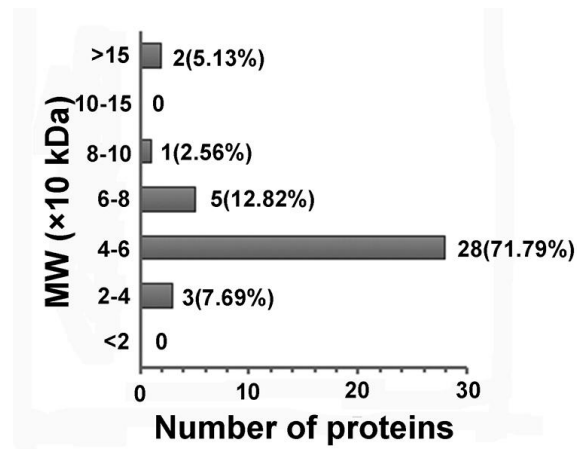

**Supplementary Figure 1** Distributions of the proteins that interacted with both C2A and C2B domains as a function of MW.

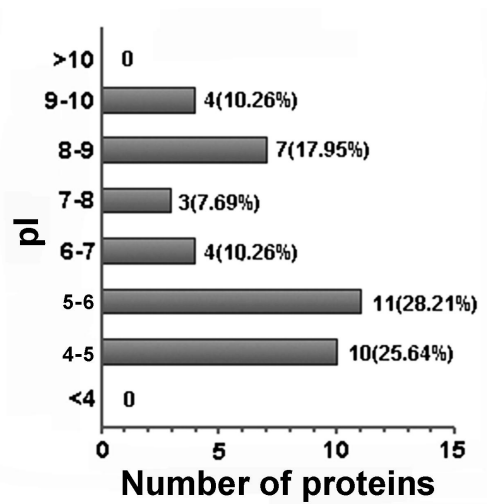

**Supplementary Figure 2** Distributions of the proteins that interacted with both C2A and C2B domains as a function of pI.
